# Supplementary material for: Isolation and Characterization of Plant-Growth-Promoting, Drought-Tolerant Rhizobacteria for Improved Maize Productivity
Source: MDPI journal article supplement (doi:10.3390/plants13101298), 2024-05-08
Supplement: s1 [file s1]

# Isolation and Characterization of Plant-Growth-Promoting, Drought Tolerant Rhizobacteria for Improved Maize Productivity

Victor Funso Agunbiade, Ayomide Emmanuel Fadiji, Nadège Adoukè Agbodjato and Olubukola Oluranti Babalola \*

Food Security and Safety Focus Area, Faculty of Natural and Agricultural Sciences, North-West University,  
Mmabatho, South Africa

\* Correspondence: Olubukola Oluranti Babalola; E-mail: olubukola.babalola@nwu.ac.za; Tel.: +27-18-389-2568

## Supplementary files

| Parameters                                   |                                                                                   | Rhizobacterial Isolates                                                           |                                                                                    |                                                                                     |                                                                                     |                                                                                     |
|----------------------------------------------|-----------------------------------------------------------------------------------|-----------------------------------------------------------------------------------|------------------------------------------------------------------------------------|-------------------------------------------------------------------------------------|-------------------------------------------------------------------------------------|-------------------------------------------------------------------------------------|
| Isolate code                                 | A5-1                                                                              | A1-2                                                                              | B8-3                                                                               | B12-4                                                                               | B9-5                                                                                | B15-6                                                                               |
| Identification of isolates according to NCBI | <i>B. licheniformis</i>                                                           | <i>A. caviae</i>                                                                  | <i>B. cereus</i>                                                                   | <i>P. flexa</i>                                                                     | <i>B. licheniformis</i>                                                             | <i>B. simplex</i>                                                                   |
| Microscopic appearance                       | 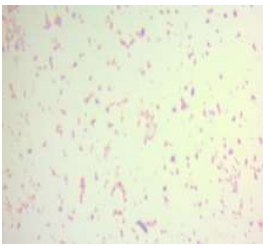 |  |  |  |  |  |
| Accession No :                               | ON745408                                                                          | ON745409                                                                          | ON745413                                                                           | ON745414                                                                            | ON745412                                                                            | ON745413                                                                            |
| % Similarity                                 | 100                                                                               | 99.83                                                                             | 100                                                                                | 100                                                                                 | 100                                                                                 | 100                                                                                 |
| Isolate code                                 | C6-7                                                                              | C7_8                                                                              | C1-9                                                                               | A9-10                                                                               | A10-11                                                                              |                                                                                     |
| Identification of isolates according to NCBI | <i>P. flexa</i>                                                                   | <i>A. veronii</i>                                                                 | <i>P. aryabhattai</i>                                                              | <i>B. halotolerans</i>                                                              | <i>B. endophyticus</i>                                                              |                                                                                     |

|                        |                                                                                   |                                                                                   |                                                                                    |                                                                                     |                                                                                     |
|------------------------|-----------------------------------------------------------------------------------|-----------------------------------------------------------------------------------|------------------------------------------------------------------------------------|-------------------------------------------------------------------------------------|-------------------------------------------------------------------------------------|
| Microscopic appearance | 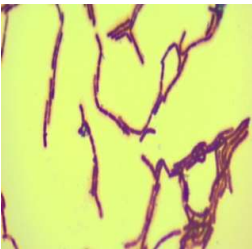 |  |  |  |  |
| Accession No :         | ON745414                                                                          | ON745415                                                                          | ON745416                                                                           | ON745417                                                                            | ON745418                                                                            |
| % Similarity           | 100                                                                               | 100                                                                               | 100                                                                                | 100                                                                                 | 100                                                                                 |

**Figure S1.** Microscopic View of Rhizobacterial Strains Isolated from Maize Plants.

**Table S1.** Morpho-biochemical Characteristics of The Isolated Rhizobacterial Strains.

| Bacteria identified | Gram Reaction | Shape     | Motility   | Catalase | Oxidase | SH | CIT | NR | MAL | LAC | GLU | SUC | FRU | XYL | GAL |
|---------------------|---------------|-----------|------------|----------|---------|----|-----|----|-----|-----|-----|-----|-----|-----|-----|
| A5-1                | +             | Short rod | Motile     | +        | +       | -  | +   | +  | +   | -   | +   | +   | +   | +   | +   |
| A1-2                | -             | Short rod | Motile     | +        | +       | +  | +   | +  | +   | +   | +   | +   | -   | -   | -   |
| B8-3                | +             | Short rod | Motile     | -        | +       | +  | +   | +  | +   | -   | +   | +   | -   | -   | -   |
| B12-4               | +             | Rod       | Motile     | +        | -       | -  | +   | ND | +   | +   | +   | +   | -   | -   | +   |
| B9-5                | +             | Rod       | Motile     | +        | +       | +  | -   | +  | +   | +   | +   | +   | -   | -   | -   |
| B15-6               | +             | Rod       | Motile     | -        | +       | -  | -   | +  | +   | +   | +   | +   | -   | -   | -   |
| C6-7                | +             | Bacilli   | Motile     | +        | -       | +  | +   | +  | +   | -   | +   | +   | +   | +   | +   |
| C7_8                | -             | Cocci     | Motile     | +        | +       | +  | +   | +  | +   | +   | +   | +   | -   | -   | -   |
| C1-9                | +             | Rod       | Motile     | +        | -       | -  | +   | +  | +   | -   | +   | +   | -   | -   | -   |
| A9-10               | +             | Cocci     | Non-motile | +        | -       | -  | +   | +  | +   | -   | +   | +   | +   | ND  | -   |
| A10-11              | +             | Rod       | Non-motile | +        | +       | -  | +   | +  | +   | -   | +   | +   | -   | -   | +   |

Legend: - = negative, + = positive, ND=Not determined, SH=Starch Hydrolysis, CIT=Citrate, NR=Nitrate Reduction, MAL=Maltose, SUC=Sucrose, GLU=Glucose, LAC=Lactose, FRU=Fructose, XYL= Xylose, GAL=Galactose.

**The calculation of Field Capacity (FC)**

Add 6 kg of soil 3 Liters of Maximum Water Retention Capacity (MRC), i.e. 50 ml MRC water for 100 g of soil.  
2/9 MRC water was used. i.e.  $(3000 \text{ ml} \times 2)/9 = 666, 66 \text{ ml}$  or 670 ml.

**For drought:**

100%, 670 ml of water for 6 kg of soil was used.

50%, 335 ml of water for 6 kg of soil was used.

25%, 167 ml, 5, or 170 ml of water for 6 kg of soil was used.
